# Supplementary material for: Scale-Up of the Fermentation Process for the Production and Purification of Serratiopeptidase Using Silkworm Pupae as a Substrate
Source: MDPI journal article supplement (doi:10.3390/mps7020019), 2024-02-25
Supplement: s1 [file s1]

**Table S3.** Analysis of Variance for SN ratios using proteolytic activity as the response.

| <b>Source</b>  | <b>DF</b> | <b>Seq SS</b> | <b>Adj SS</b> | <b>Adj MS</b> | <b>F</b> | <b>P</b> |
|----------------|-----------|---------------|---------------|---------------|----------|----------|
| Silkworm pupae | 5         | 282,998       | 282,998       | 56,600        | 13,41    | 0,003    |
| pH             | 2         | 4,832         | 4,832         | 2,416         | 0,57     | 0,592    |
| Time           | 2         | 28,213        | 28,213        | 14,107        | 3,34     | 0,106    |
| Temperature    | 2         | 39,093        | 39,093        | 19,547        | 4,63     | 0,061    |
| Residual Error | 6         | 25,329        | 25,329        | 4,221         |          |          |
| Total          | 17        | 380,466       |               |               |          |          |
