# Supplementary material for: Scale-Up of the Fermentation Process for the Production and Purification of Serratiopeptidase Using Silkworm Pupae as a Substrate
Source: MDPI journal article supplement (doi:10.3390/mps7020019), 2024-02-25
Supplement: s1 [file s1]

**Table S1.** Plackett-Burman design in 12 runs to 6 factors. The response is proteolytic activity.

| <b>Trial number</b> | <b>Run order</b> | <b>Silkworm pupae (%)<sup>*</sup></b> | <b>Casein (%)<sup>*</sup></b> | <b>Soy oil (%)<sup>*</sup></b> | <b>(NH<sub>4</sub>)<sub>2</sub>HPO<sub>4</sub> (%)<sup>*</sup></b> | <b>ZnCl<sub>2</sub> (%)<sup>*</sup></b> | <b>CaCl<sub>2</sub>·2H<sub>2</sub>O (%)<sup>*</sup></b> | <b>Proteolytic activity (U/mL)<sup>**</sup></b> |
|---------------------|------------------|---------------------------------------|-------------------------------|--------------------------------|--------------------------------------------------------------------|-----------------------------------------|---------------------------------------------------------|-------------------------------------------------|
| 9                   | 1                | 0.00                                  | 0.10                          | 0.10                           | 2.00                                                               | 0.20                                    | 0.20                                                    | 122.22 ± 31.43                                  |
| 12                  | 2                | 0.00                                  | 0.10                          | 0.10                           | 0.50                                                               | 0.01                                    | 0.01                                                    | 1161.11 ± 86.42                                 |
| 4                   | 3                | 2.50                                  | 0.10                          | 2.00                           | 2.00                                                               | 0.01                                    | 0.20                                                    | 2127.78 ± 7.86                                  |
| 11                  | 4                | 0.00                                  | 2.50                          | 0.10                           | 0.50                                                               | 0.01                                    | 0.20                                                    | 1538.89 ± 7.85                                  |
| 2                   | 5                | 2.50                                  | 2.50                          | 0.10                           | 2.00                                                               | 0.01                                    | 0.01                                                    | 1116.67 ± 86.42                                 |
| 5                   | 6                | 2.50                                  | 2.50                          | 0.10                           | 2.00                                                               | 0.20                                    | 0.01                                                    | 955.56 ± 78.57                                  |
| 1                   | 7                | 2.50                                  | 0.10                          | 2.00                           | 0.50                                                               | 0.01                                    | 0.01                                                    | 2322.22 ± 57.74                                 |
| 6                   | 8                | 2.50                                  | 2.50                          | 2.00                           | 0.50                                                               | 0.20                                    | 0.20                                                    | 4811.11 ± 491.03                                |
| 3                   | 9                | 0.00                                  | 2.50                          | 2.00                           | 0.50                                                               | 0.20                                    | 0.01                                                    | 366.67 ± 130.99                                 |
| 8                   | 10               | 0.00                                  | 0.10                          | 2.00                           | 2.00                                                               | 0.20                                    | 0.01                                                    | 418.51 ± 35.72                                  |
| 7                   | 11               | 0.00                                  | 2.50                          | 2.00                           | 2.00                                                               | 0.01                                    | 0.20                                                    | 2285.19 ± 289.81                                |
| 10                  | 12               | 2.50                                  | 0.10                          | 0.10                           | 0.50                                                               | 0.20                                    | 0.20                                                    | 3588.89 ± 172.49                                |

<sup>\*</sup> All percentages refer to the ratio of mass to volume.

<sup>\*\*</sup> Proteolytic activity is expressed as mean ± SD.
