# Supplementary material for: Scale-Up of the Fermentation Process for the Production and Purification of Serratiopeptidase Using Silkworm Pupae as a Substrate
Source: MDPI journal article supplement (doi:10.3390/mps7020019), 2024-02-25
Supplement: s1 [file s1]

**Table S2.** Taguchi design. Mixed level design. L18 (6<sup>1</sup> 3<sup>3</sup>).

| <b>Trial number*</b> | <b>pH</b> | <b>Temperature (°C)</b> | <b>Time (h)</b> | <b>Silkworm pupae (%<sup>w/v</sup>)</b> | <b>Proteolytic activity (U/mL)</b> |
|----------------------|-----------|-------------------------|-----------------|-----------------------------------------|------------------------------------|
| <b>1</b>             | 6         | 20                      | 24              | 0.1                                     | 874.07 ± 6.42                      |
| <b>2</b>             | 7         | 25                      | 36              | 0.1                                     | 2000.00 ± 245.70                   |
| <b>3</b>             | 8         | 30                      | 48              | 0.1                                     | 644.44 ± 105.99                    |
| <b>4</b>             | 6         | 25                      | 24              | 0.5                                     | 2474.07 ± 99.59                    |
| <b>5</b>             | 7         | 30                      | 36              | 0.5                                     | 3474.07 ± 138.93                   |
| <b>6</b>             | 8         | 20                      | 48              | 0.5                                     | 3477.78 ± 101.84                   |
| <b>7</b>             | 6         | 20                      | 36              | 1.0                                     | 3059.26 ± 222.59                   |
| <b>8</b>             | 7         | 25                      | 48              | 1.0                                     | 3792.59 ± 228.88                   |
| <b>9</b>             | 8         | 30                      | 24              | 1.0                                     | 2700.00 ± 50.92                    |
| <b>10</b>            | 6         | 30                      | 48              | 1.5                                     | 3222.22 ± 189.98                   |
| <b>11</b>            | 7         | 20                      | 24              | 1.5                                     | 3425.93 ± 209.74                   |
| <b>12</b>            | 8         | 25                      | 36              | 1.5                                     | 4900.00 ± 196.58                   |
| <b>13</b>            | 6         | 30                      | 36              | 2.0                                     | 3318.52 ± 241.48                   |
| <b>14</b>            | 7         | 20                      | 48              | 2.0                                     | 4088.89 ± 534.26                   |
| <b>15</b>            | 8         | 25                      | 24              | 2.0                                     | 3874.07 ± 324.39                   |
| <b>16</b>            | 6         | 25                      | 48              | 2.5                                     | 5027.78 ± 296.66                   |
| <b>17</b>            | 7         | 30                      | 24              | 2.5                                     | 2292.59 ± 128.78                   |
| <b>18</b>            | 8         | 20                      | 36              | 2.5                                     | 4262.96 ± 262.55                   |

\*The experiment runs were carried out in a random order.
