# Supplementary material for: Scale-Up of the Fermentation Process for the Production and Purification of Serratiopeptidase Using Silkworm Pupae as a Substrate
Source: MDPI journal article supplement (doi:10.3390/mps7020019), 2024-02-25
Supplement: s1 [file s1]

**Table S4.** Results of varying stirrer speed and aeration rate for determining the  $K_{La}$  value.

| <b>Trial number</b> | <b>Stirrer speed (rpm)</b> | <b>volume of air per volume of medium per minute (vvm)</b> | <b>Aeration rate (SL/h)</b> | <b><math>K_{La}</math> value (h<sup>-1</sup>)</b> |
|---------------------|----------------------------|------------------------------------------------------------|-----------------------------|---------------------------------------------------|
| 1                   | 300                        | 1.5                                                        | 240                         | $30.47 \pm 3.39$                                  |
| 2                   | 200                        | 1.5                                                        | 240                         | $19.41 \pm 3.13$                                  |
| 3                   | 100                        | 1.5                                                        | 240                         | $10.69 \pm 1.91$                                  |
| 4                   | 300                        | 1.0                                                        | 160                         | $28.36 \pm 3.40$                                  |
| 5                   | 200                        | 1.0                                                        | 160                         | $16.05 \pm 3.67$                                  |
| 6                   | 100                        | 1.0                                                        | 160                         | $8.68 \pm 1.97$                                   |
| 7                   | 300                        | 0.5                                                        | 80                          | $25.45 \pm 3.12$                                  |
| 8                   | 200                        | 0.5                                                        | 80                          | $11.05 \pm 1.76$                                  |
| 9                   | 100                        | 0.5                                                        | 80                          | $5.94 \pm 0.75$                                   |
